# Supplementary material
Source: HighWire-hosted journal article supplement (https://delf06.com/highwire/filestream/93978/field_highwire_adjunct_files/1/Explanation_of_new_table_1.pdf)
Supplement: Explanation_of_new_table_1.pdf [file Explanation_of_new_table_1.pdf]

Following the submission of the revisions for our paper 'Helping pregnant women make better decisions: a systematic review of the benefits of patient decision aids in obstetrics' [bmjopen-2011-000261](https://doi.org/10.1136/bmjopen-2011-000261), and in particular the addition of Table 2 summarising the quality of the studies, we have re-reviewed our tables.

As all the studies are included together in Table 2, we propose to combine the other two summary tables and add-in the studies by Nassar et al and by Raynes-Greenow et al (which were not previously summarised in table form) as Table 1. I have attached the amended table as a word document.

I am really sorry to suggest this after I had submitted the revisions but believe it would be clearer than the existing tables. I have made a few minor changes to clarify/ add detail to the text in the table. I have also changed the 'population' heading to 'participants' and have amended numbers so that they reflect the number of women randomised for consistency (as previously participants approached had been included for some studies depending on how the numbers were reported). I have also corrected a few typos I had found.

Please advise if you would like me to resubmit this through the Author Centre. In terms of affects on the main document, if you accept this revised table I will need to change any references to Table 3 to Table 2. Again many apologies for submitting this after the revisions but having had further time to reflect on them and the paper I do think this table would be an improvement.

Best Wishes  
Rebecca Say
